# Supplementary material for: ERK Inhibitor Enhances Everolimus Efficacy through the Attenuation of dNTP Pools in Renal Cell Carcinoma
Source: PubMed Central journal article supplement — Mol Ther Nucleic Acids. 2019 Jan 10;14:550–61. doi: 10.1016/j.omtn.2019.01.001 (PMC6374702; doi:10.1016/j.omtn.2019.01.001), 2019-01-10
Supplement: mmc1.pdf [file mmc1.pdf]

**OMTN, Volume 14**

**Supplemental Information**

**ERK Inhibitor Enhances Everolimus Efficacy  
through the Attenuation  
of dNTP Pools in Renal Cell Carcinoma**

**Yun Zou, Wenzhi Li, Juan Zhou, Jin Zhang, Yiran Huang, and Zhong Wang**

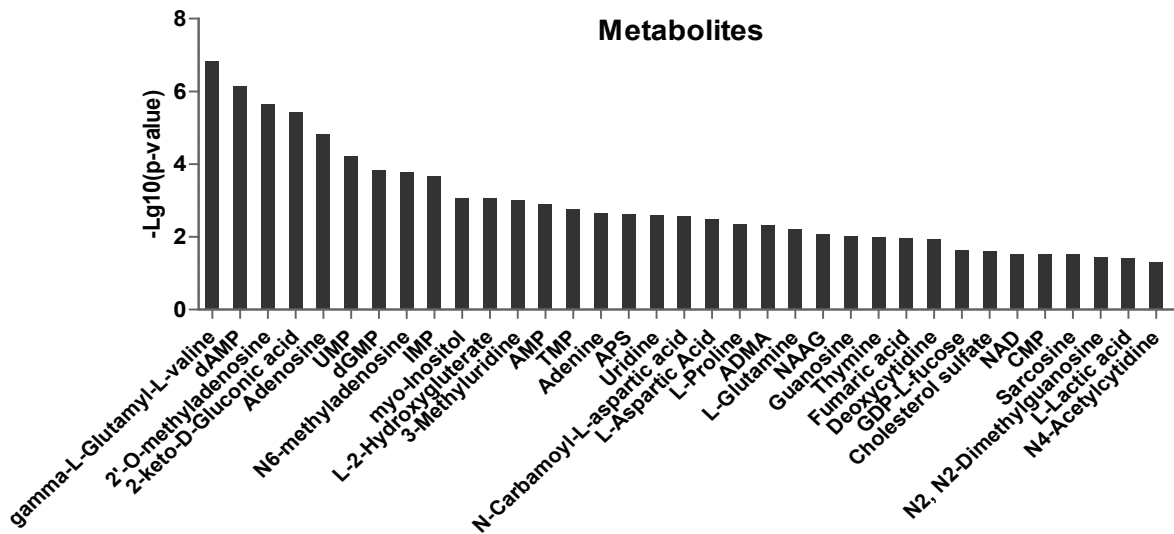

**Figure S1.** A comprehensive list of all altered 35 metabolites affected by combination therapy after one-way ANOVA analysis.

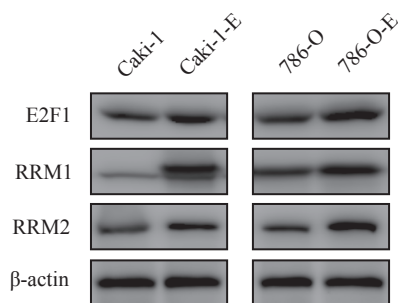

**Figure S2.** The difference of essential enzyme involved in purine metabolism between everolimus resistant cell lines and parental cell lines.
